# Supplementary figures and images for: Plasma neurofilament heavy chain levels and disease progression in amyotrophic lateral sclerosis: insights from a longitudinal study
Source: PubMed Central journal article supplement — J Neurol Neurosurg Psychiatry. 2014 Jul 9;86(5):565–73. doi: 10.1136/jnnp-2014-307672 (PMC4413806; doi:10.1136/jnnp-2014-307672), 2014-07-09

# Supplementary Figure

Supplementary Figure 1\_Lu et al\_JNNP 2014

A

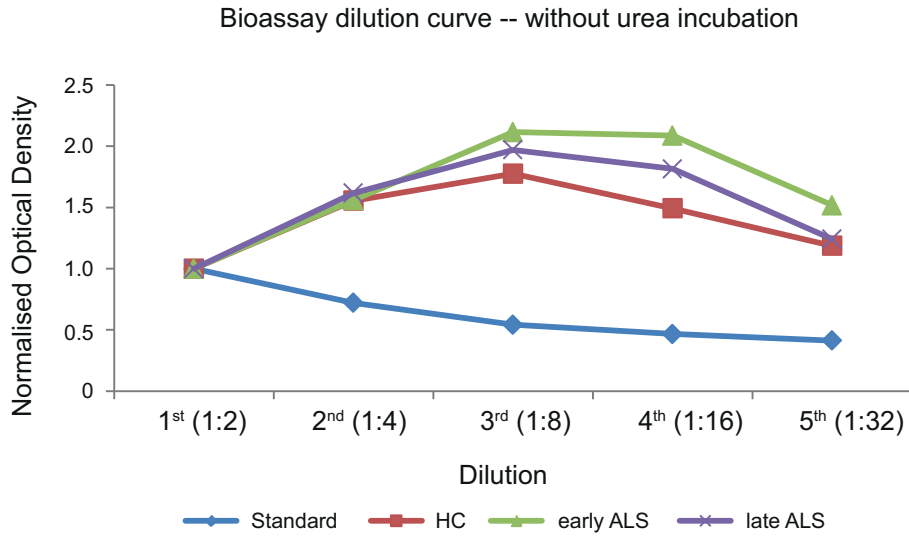

B

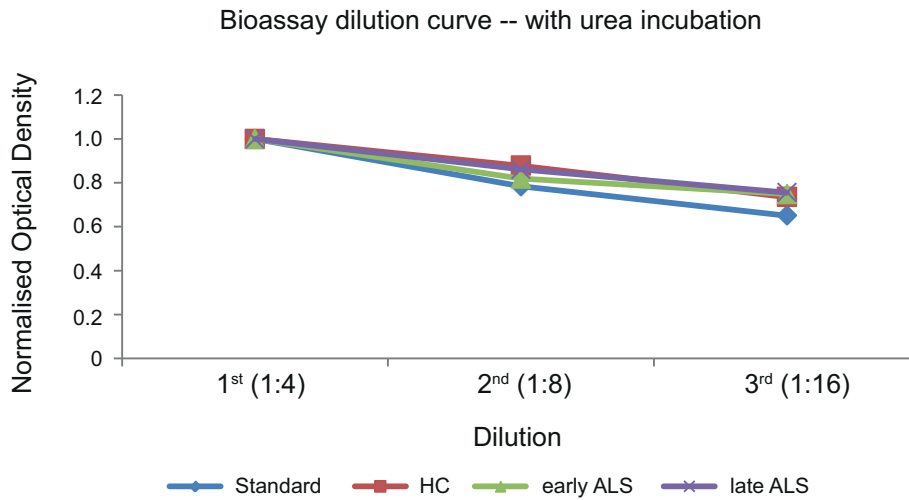

Supplement: jnnp-2014-307672-s1.pdf [file jnnp-2014-307672-s1.pdf]
